# Supplementary material for: Phenolic Composition, Antioxidant, Anti-Enzymatic, Antimicrobial and Prebiotic Properties of Prunus spinosa L. Fruits
Source: MDPI journal article supplement (doi:10.3390/foods11203289), 2022-10-20
Supplement: s1 [file s1]

## Supplementary Materials

A

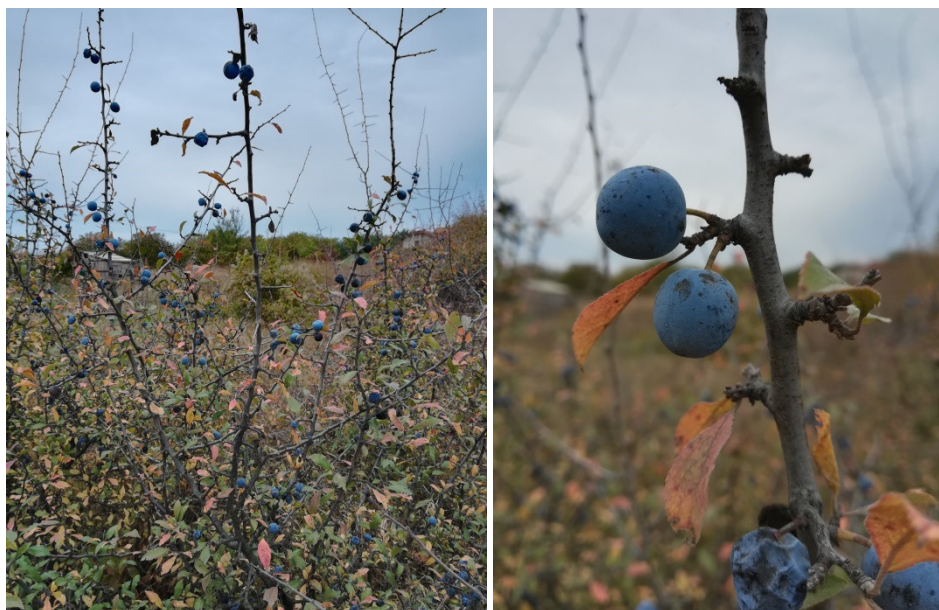

B

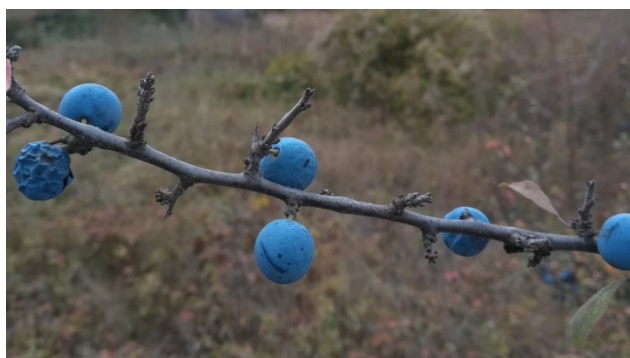

**Figure S1.** Blackthorn fruits, *Prunus spinosa* **A** - Crni vrh, central Serbia; **B** – Ljig, western Serbia

**Table S1.** Bacterial and yeast strains used in experiments.

|                                                                                                                                  |
|----------------------------------------------------------------------------------------------------------------------------------|
| <b>Pathogenic microorganisms</b>                                                                                                 |
| <b>Gram-positive bacteria</b>                                                                                                    |
| <i>Staphylococcus aureus</i> subsp. <i>aureus</i> Rosenbach ATCC 6538                                                            |
| <i>Staphylococcus epidermidis</i> ATCC 12228                                                                                     |
| <i>Enterococcus faecalis</i> ATCC 29212                                                                                          |
| <i>Bacillus subtilis</i> ATCC 6633                                                                                               |
| <b>Gram-negative bacteria</b>                                                                                                    |
| <i>Escherichia coli</i> ATCC 25922                                                                                               |
| <i>Klebsiella pneumoniae</i> subsp. <i>pneumoniae</i> NCIMB 8267                                                                 |
| <i>Salmonella enterica</i> subsp. <i>enterica</i> serovar Abony NCTC 6017                                                        |
| <i>Pseudomonas aeruginosa</i> ATCC 27853,                                                                                        |
| <b>Yeast</b>                                                                                                                     |
| <i>Candida albicans</i> ATCC 24433                                                                                               |
| <b>Probiotic strains</b>                                                                                                         |
| <b>Gram-positive bacteria</b>                                                                                                    |
| <i>Lactobacillus plantarum</i> Lp 299v                                                                                           |
| <i>Limosilactobacillus reuteri</i> Protectis (DSM 17938) (formerly <i>Lactobacillus reuteri</i> )                                |
| <i>Lactobacillus rhamnosus</i> GG (LGG)                                                                                          |
| <i>Streptococcus salivarius</i> subsp. <i>thermophilus</i> ST-21                                                                 |
| <b>Yeast</b>                                                                                                                     |
| <i>Saccharomyces boulardii</i> strain 1                                                                                          |
| <i>Saccharomyces boulardii</i> strain 2                                                                                          |
| <b>Mixtures of probiotic strains</b>                                                                                             |
| <b>MIX 1</b> <i>Lactobacillus helveticus</i> Rosell-52, <i>L. rhamnosus</i> Rosell-11, <i>Bifidobacterium longum</i> Rosell-175  |
| <b>MIX 2</b> <i>Lactobacillus helveticus</i> Rosell-52, <i>L. rhamnosus</i> Rosell-11, <i>Bifidobacterium longum</i> Rosell-175, |
| <i>Saccharomyces boulardii</i>                                                                                                   |

**Table S2.** Identified compounds in blackthorn fruit extracts

| <i>t<sub>R</sub></i><br>(min) | UV $\lambda_{\text{max}}$ (nm) | ESI-MS data ( <i>m/z</i> ) | Assignment                                                                  |
|-------------------------------|--------------------------------|----------------------------|-----------------------------------------------------------------------------|
| 10.1                          | 254, 290                       | 329, 167                   | Vanillic acid hexoside                                                      |
| 11.1                          | 236, 296sh, 324                | 353, 191, 179, 135         | Caffeoylquinic acid 1                                                       |
| 17.2                          | 242, 296sh, 324                | 367, 193, 134              | Feruloylquinic acid                                                         |
| 17.8                          | 240, 296sh, 328                | 353, 191, 179, 173, 135    | Caffeoylquinic acid 2                                                       |
| 21.0                          | 280, 518                       | 595, 449, 287              | Cyanidin hexoside + cyanidin deoxyhexoside-hexoside                         |
| 24.5                          | 280, 518                       | 609, 463, 301              | Peonidin hexoside + peonidin deoxyhexoside-hexoside                         |
| 26.6                          | 234, 296sh, 326                | 335, 161, 133              | Caffeoylshikimic acid                                                       |
| 30.9                          | 256, 266sh, 352                | 595, 300                   | Quercetin pentoside-hexoside 1                                              |
| 31.7                          | 256, 266sh, 354                | 609, 300                   | Quercetin deoxyhexoside-hexoside 1                                          |
| 32.7                          | 256, 266sh, 354                | 463, 300                   | Quercetin hexoside 1                                                        |
| 32.9                          | 256, 266sh, 352                | 595, 300                   | Quercetin pentoside-hexoside 2                                              |
| 33.2                          | 256, 266sh, 354                | 463, 300                   | Quercetin hexoside 2                                                        |
| 35.0                          | 256, 266sh, 356                | 433, 300                   | Quercetin pentoside 1                                                       |
| 35.8                          | 256, 266sh, 356                | 433, 300                   | Quercetin pentoside 2                                                       |
| 36.4                          | 254, 266sh, 352                | 623, 609, 315, 300         | Methylquercetin deoxyhexoside-hexoside + quercetin deoxyhexoside-hexoside 2 |
| 37.0                          | 256, 266sh, 352                | 433, 300                   | Quercetin pentoside 3                                                       |
| 37.4                          | 256, 264sh, 350                | 447, 300                   | Quercetin deoxyhexoside                                                     |
| 40.5                          | 254, 266sh, 356                | 447, 314                   | Methylquercetin pentoside 1                                                 |
| 41.3                          | 254, 266sh, 356                | 447, 314                   | Methylquercetin pentoside 2                                                 |
| 42.3                          | 262, 344                       | 431, 284                   | Kaempferol deoxyhexoside                                                    |
| 42.7                          | 254, 264sh, 354                | 447, 314                   | Methylquercetin pentoside 3                                                 |
| 43.6                          | 256, 266sh, 352                | 651, 301                   | Quercetin acetyl-(deoxyhexoside-hexoside)                                   |
| 44.4                          | 256, 266sh, 354                | 519, 314                   | Methylquercetin acetylhexoside                                              |
| 46.0                          | 256, 374                       | 301                        | Quercetin                                                                   |

*t<sub>R</sub>* – retention time. Mass spectra of phenolic acids and flavonoids were generated in the negative mode, whereas mass spectra of anthocyanins were acquired using positive mode.

**Table S3.** Correlations between total phenolic (TPC), total flavonoid (TFC) and total anthocyanin (TAC) content and antioxidant properties of blackthorn fruit extracts.

|             | DPPH     | ABTS     | FRAP     | $\beta$ -carotene<br>bleaching<br>inhibition | ACI      |
|-------------|----------|----------|----------|----------------------------------------------|----------|
| <b>PSM1</b> |          |          |          |                                              |          |
| TPC         | 0.983*** | 0.985*** | 0.943*** | 0.808***                                     | 0.981*** |
| TFC         | 0.211    | 0.325    | 0.383    | -0.287                                       | 0.138    |
| TAC         | 0.722    | 0.449    | 0.643    | 0.962**                                      | 0.773    |
| <b>PSM2</b> |          |          |          |                                              |          |
| TPC         | 0.942*** | 0.333    | 0.766*   | 0.924***                                     | 0.928*** |
| TFC         | -0.099   | 0.822**  | 0.348    | -0.336                                       | 0.123    |
| TAC         | 0.897*   | -0.099   | 0.459    | 0.942**                                      | 0.734    |

PSM1 – methanol extract of *P. spinosa* fruit from the location in western Serbia; PSM2 – methanol extract of *P. spinosa* fruit from the location in central Serbia; \* $p < 0.05$ ; \*\* $p < 0.01$ ; \*\*\* $p < 0.001$

**Table S4.** Prebiotic effect of blackthorn fruit methanol extracts.

| Probiotic strain                                                                                  | PSM1 (mg/mL)    |                 |                 |                 |                 |                 |
|---------------------------------------------------------------------------------------------------|-----------------|-----------------|-----------------|-----------------|-----------------|-----------------|
|                                                                                                   | 5               | 2.5             | 1.25            | 0.625           | 0.313           | 0               |
| <i>L. plantarum</i>                                                                               | 132.5 Aa        | 124.0 Aab       | 117.1 Aab       | 104.8 Ab        | 105.5 Ab        | 100 b           |
| <i>L. reuteri</i>                                                                                 | 133.7 Aa        | 125.7 Aab       | 114.2 Aab       | 108.4 Aab       | 104.6 Aab       | 100 b           |
| <i>L. rhamnosus</i>                                                                               | 127.2 Aa        | 117.0 Aab       | 113.4 Aabc      | 109.4 Abc       | 107.1 Abc       | 100 c           |
| <i>S. thermophilus</i>                                                                            | 136.2 Aa        | 124.2 Ab        | 114.4 Abc       | 111.4 Ac        | 104.7 Acd       | 100 d           |
| <i>S. boulardii</i> 1                                                                             | 139.7 Aa        | 126.4 Aab       | 117.3 Abc       | 111.2 Abcd      | 105.1 Acd       | 100 d           |
| <i>S. boulardii</i> 2                                                                             | 148.9 Aa        | 143.9 Aa        | 129.8 Ab        | 111.1 Ac        | 110.5 Ac        | 100 d           |
| <i>L. helveticus</i> , <i>L. rhamnosus</i> ,<br><i>B. longum</i> (Mix 1)                          | 127.5 Aa        | 120.9 Aab       | 111.8 Abc       | 110.0 Bbcd      | 108.1 Acd       | 100 d           |
| <i>L. helveticus</i> , <i>L. rhamnosus</i> ,<br><i>B. longum</i> , <i>S. boulardii</i><br>(Mix 2) | 135.0 Aa        | 130.4 Aab       | 124.9 Aab       | 117.4 Abc       | 107.6 Acd       | 100 d           |
| Mean $\pm$ SD                                                                                     | 135.1 $\pm$ 7.0 | 126.6 $\pm$ 8.1 | 117.9 $\pm$ 6.3 | 110.5 $\pm$ 3.5 | 106.6 $\pm$ 2.1 | 100.0 $\pm$ 0.0 |
| Probiotic strain                                                                                  | PSM2 (mg/mL)    |                 |                 |                 |                 |                 |
|                                                                                                   | 5               | 2.5             | 1.25            | 0.625           | 0.313           | 0               |
| <i>L. plantarum</i>                                                                               | 137.3 Aa        | 128.1 Aab       | 118.2 Aabc      | 110.6 Abc       | 104.8 Abc       | 100 c           |
| <i>L. reuteri</i>                                                                                 | 138.1 Aa        | 123.8 Aab       | 112.7 Aab       | 106.5 Aab       | 104.0 Ab        | 100 b           |
| <i>L. rhamnosus</i>                                                                               | 136.6 Aa        | 129.0 Aab       | 121.9 Aabc      | 114.7 Abcd      | 110.7 Acd       | 100 d           |
| <i>S. thermophilus</i>                                                                            | 140.3 Aa        | 128.5 Ab        | 114.4 Ac        | 110.4 Acd       | 99.3 Ad         | 100 d           |
| <i>S. boulardii</i> 1                                                                             | 151.2 Aa        | 134.6 Ab        | 126.4 Abc       | 114.9 Acd       | 110.5 Acd       | 100 d           |
| <i>S. boulardii</i> 2                                                                             | 152.8 Aa        | 145.2 Aa        | 129.8 Ab        | 118.4 Ac        | 111.5 Ac        | 100 d           |
| <i>L. helveticus</i> , <i>L. rhamnosus</i> ,<br><i>B. longum</i> (Mix 1)                          | 141.8 Aa        | 129.4 Ab        | 122.7 Abc       | 114.4 Acd       | 109.8 Ade       | 100 e           |
| <i>L. helveticus</i> , <i>L. rhamnosus</i> ,<br><i>B. longum</i> , <i>S. boulardii</i><br>(Mix 2) | 137.5 Aa        | 135.0 Aa        | 125.2 Aab       | 116.7 Abc       | 106.9 Acd       | 100 d           |
| Mean $\pm$ SD                                                                                     | 142.0 $\pm$ 6.4 | 131.7 $\pm$ 6.5 | 121.4 $\pm$ 5.9 | 113.3 $\pm$ 3.9 | 107.2 $\pm$ 4.2 | 100.0 $\pm$ 0.0 |

PSM1 – methanol extract of *P. spinosa* fruit from the location in western Serbia; PSM2 – methanol extract of *P. spinosa* fruit from the location in central Serbia; Results are presented as percent of growth compared to the positive control of each probiotic strain (100 %). Different letters a–e indicate significant differences ( $p < 0.05$ ) between the growths of probiotic species/strain treated with the increasing concentrations of same extract, whereas letters A–B indicate significant differences ( $p < 0.05$ ) between the growths of probiotics species/strain treated with the same concentration of different extract (PSM1 and PSM2).

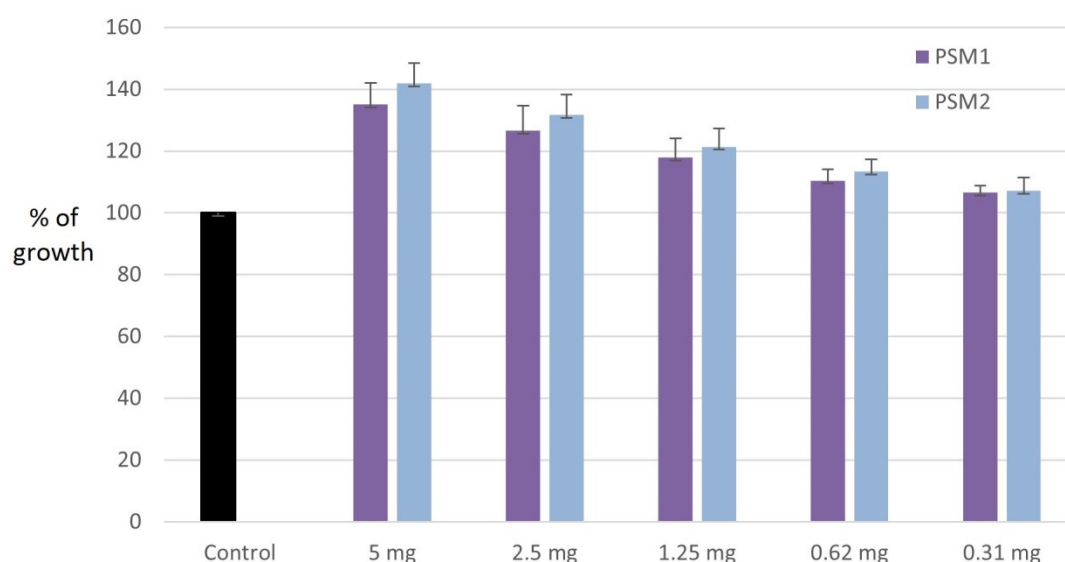

**Figure S2.** Stimulation of probiotic growth with blackthorn fruit methanol extracts.

PSM1 – methanol extract of *P. spinosa* fruit from the location in western Serbia; PSM2 – methanol extract of *P. spinosa* fruit from the location in central Serbia; Results are expressed as mean percent of growth stimulation  $\pm$  SD of all tested probiotic strains (listed in Table S4) cultivated with PSM1 or PSM2 compared the growth of positive control (expressed as 100% of growth).
